# Supplementary material for: NRF2 Is a Key Target for Prevention of Noise-Induced Hearing Loss by Reducing Oxidative Damage of Cochlea
Source: PubMed Central journal article supplement (PMC4726010; doi:10.1038/srep19329), 2016-01-18

## **NRF2 Is a Key Target for Prevention of Noise-Induced Hearing Loss by Reducing Oxidative Damage of Cochlea**

Yohei Honkura<sup>1,2</sup>, Hirotaka Matsuo<sup>3,\*</sup>, Shohei Murakami<sup>2</sup>, Masayuki Sakiyama<sup>3</sup>, Kunio Mizutani<sup>4</sup>, Akihiro Shiotani<sup>4</sup>, Masayuki Yamamoto<sup>5</sup>, Ichiro Morita<sup>6</sup>, Nariyoshi Shinomiya<sup>3</sup>, Tetsuaki Kawase<sup>1</sup>, Yukio Katori<sup>1</sup>, Hozumi Motohashi<sup>2,\*</sup>

<sup>1</sup>Department of Otolaryngology-Head & Neck Surgery, Tohoku University Graduate School of Medicine, 1-1 Seiryō-machi, Aoba-ku, Sendai, 980-8574, Japan.

<sup>2</sup>Department of Gene Expression Regulation, Institute of Development, Aging and Cancer, Tohoku University, 4-1 Seiryō-machi, Aoba-ku, Sendai, 980-8575, Japan.

<sup>3</sup>Department Integrative Physiology and Bio-Nano Medicine, National Defense Medical College, 3-2 Namiki, Tokorozawa, Saitama 359-8513, Japan.

<sup>4</sup>Department of Otolaryngology-Head and Neck Surgery, National Defense Medical College, 3-2 Namiki, Tokorozawa, Saitama 359-8513, Japan.

<sup>5</sup>Department of Medical Biochemistry, Tohoku University Graduate School of Medicine, 2-1 Seiryō-machi, Aoba-ku, Sendai, 980-8575, Japan.

<sup>6</sup>Department of Otolaryngology-Head and Neck Surgery, Self-Defense Forces Central Hospital, 1-2-24, Ikejiri, Setagaya, Tokyo 154-8532, Japan.

\*To whom correspondence should be addressed: Hirotaka Matsuo and Hozumi Motohashi

Hirotaka Matsuo

Department of Integrative Physiology and Bio-Nano Medicine,  
National Defense Medical College,

3-2 Namiki, Tokorozawa, Saitama 359-8513, Japan

TEL: 81-4-2995-1482,

FAX: 81-4-2996-5187,

E-MAIL: hmatsuo@ndmc.ac.jp

Hozumi Motohashi

Department of Gene Expression Regulation,  
Institute of Development, Aging and Cancer,

Tohoku University,

4-1 Seiryō-machi, Aoba-ku, Sendai, 980-8575, Japan

TEL: 81-22-717-8550,

FAX: 81-22-717-8554,

E-MAIL: hozumi.motohashi.a7@tohoku.ac.jp

## SUPPLEMENTARY TABLE

**Supplementary Table S1** | Sequences of primers for quantitative real-time PCR analysis.

| Gene          | Forward primer                         | Reverse primer                     | Probe                                                     |
|---------------|----------------------------------------|------------------------------------|-----------------------------------------------------------|
| <i>Gapdh</i>  | 5'-GAGATGATGAC<br>CCTTTTGGC-3'         | 5'-GTCGTGGAGTCT<br>ACTGGTGTCTT-3'  | -                                                         |
| <i>Nrf2</i>   | 5'-CAAGACTTGGG<br>CCACTTAAAAGAC-<br>3' | 5'-AGTAAGGCTTTC<br>CATCCTCATCAC-3' | 5'-FAM-AGGCGGC<br>TCAGCACCTTGTA<br>TCTTGA-TAMRA-3<br>,    |
| <i>Nqo1</i>   | 5'-AGCTGGAAGCT<br>GCAGACCTG-3'         | 5'-CCTTTCAGAATG<br>GCTGGCA-3'      | 5'-FAM-ATTTTCAGT<br>TCCCATTGCAGTG<br>GTTTGGG-TAMRA-<br>3' |
| <i>Ho-1</i>   | 5'-GTGATGGAGCG<br>TCCACAGC-3'          | 5'-TTGGTGGCCTCC<br>TTCAAGG-3'      | 5'-FAM-CGACAGC<br>ATGCCCCAGGATT<br>TGTC-TAMRA-3'          |
| <i>Gclc</i>   | 5'-ATCTGCAAAGG<br>CGGCAAC-3'           | 5'-ACTCCTCTGCAG<br>CTGGCTC-3'      | 5'-FAM-ACGGGTG<br>CAGCAAGGCCCA-<br>TAMRA-3'               |
| <i>Gclm</i>   | 5'-TGGAGCAGCTGT<br>ATCAGTGG-3'         | 5'-AAATCTGGTGGC<br>ATCACACA-3'     | -                                                         |
| <i>Txnrd1</i> | 5'-AGAAAGTGCTG<br>GTCTTGGATTTTG-3<br>, | 5'-ACACGTTCCCTCC<br>GAGACCC-3'     | 5'-FAM-TCTGGTCC<br>CAAGAGGAGTCG<br>GTGTG-TAMRA-3'         |

## SUPPLEMENTARY FIGURES

**Supplementary Figure S1** | Full-length immunoblot reacted with anti-NRF2 antibody shown in Figure 5b.

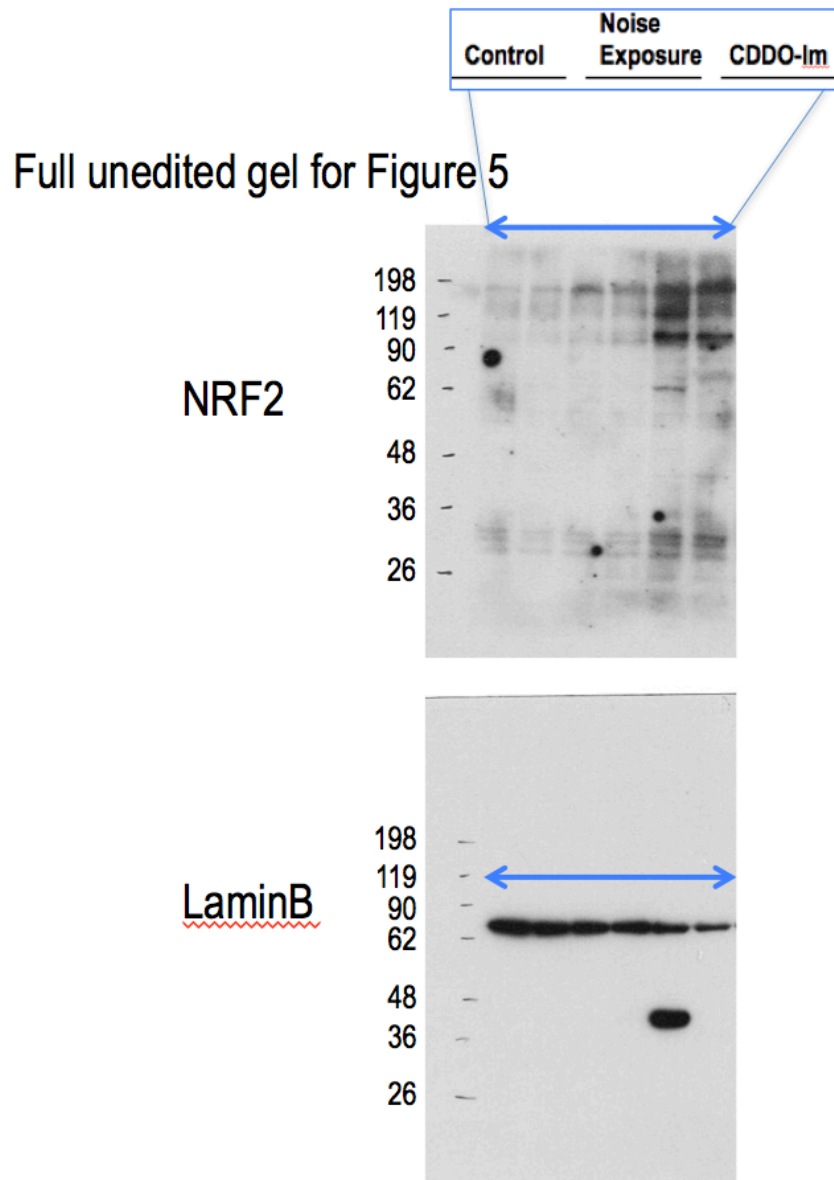

**Supplementary Figure S2** | Full-length immunoblot reacted with anti-4-HNE antibody shown in Figure 6b.

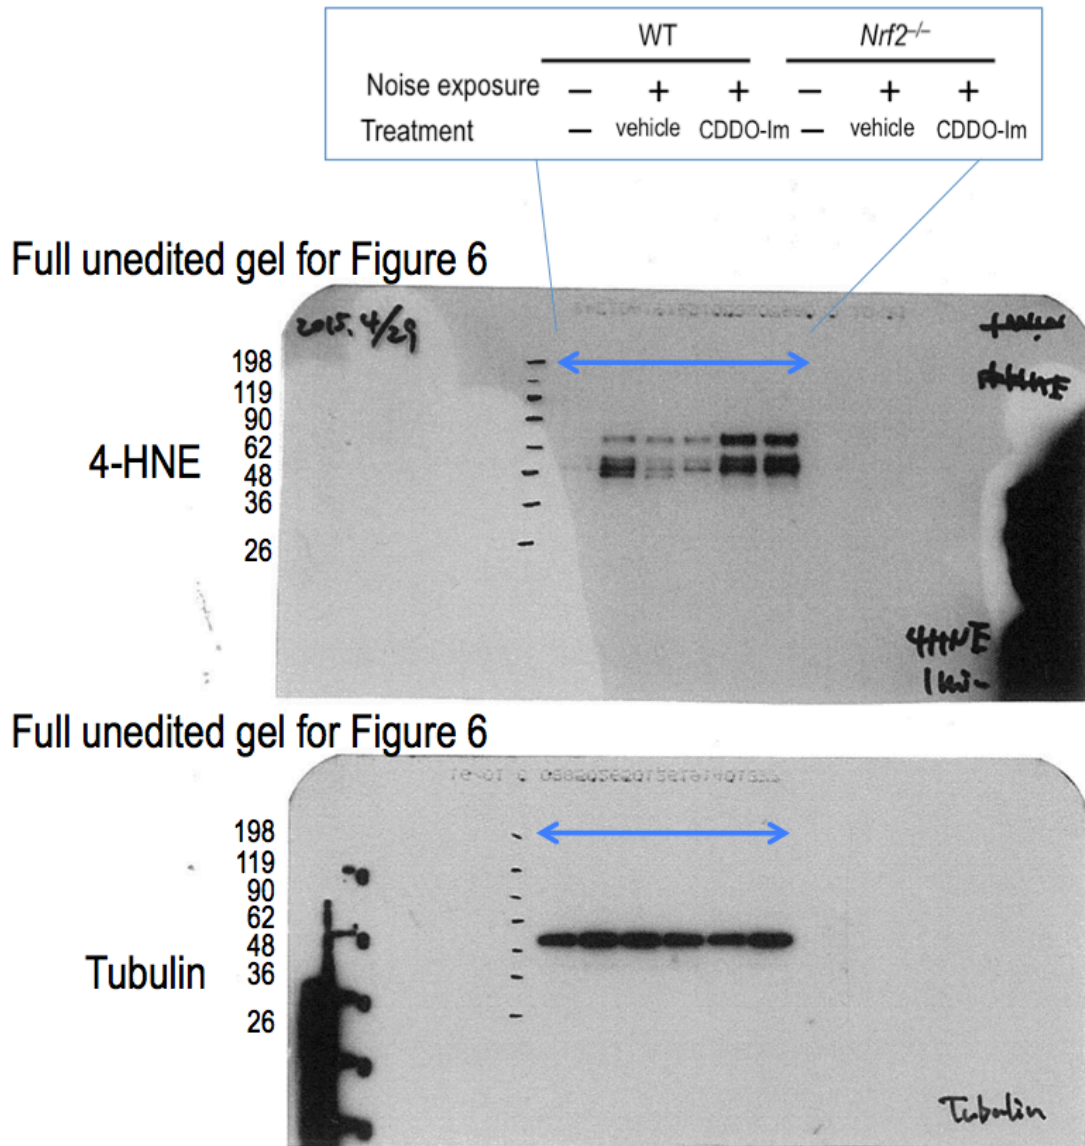

Supplement: srep19329-s1.pdf [file srep19329-s1.pdf]
